# Supplementary material
Source: PubMed Central journal article supplement (PMC2593662)
Supplement: pp.108.130336_1.pdf [file pp.108.130336_1.pdf]

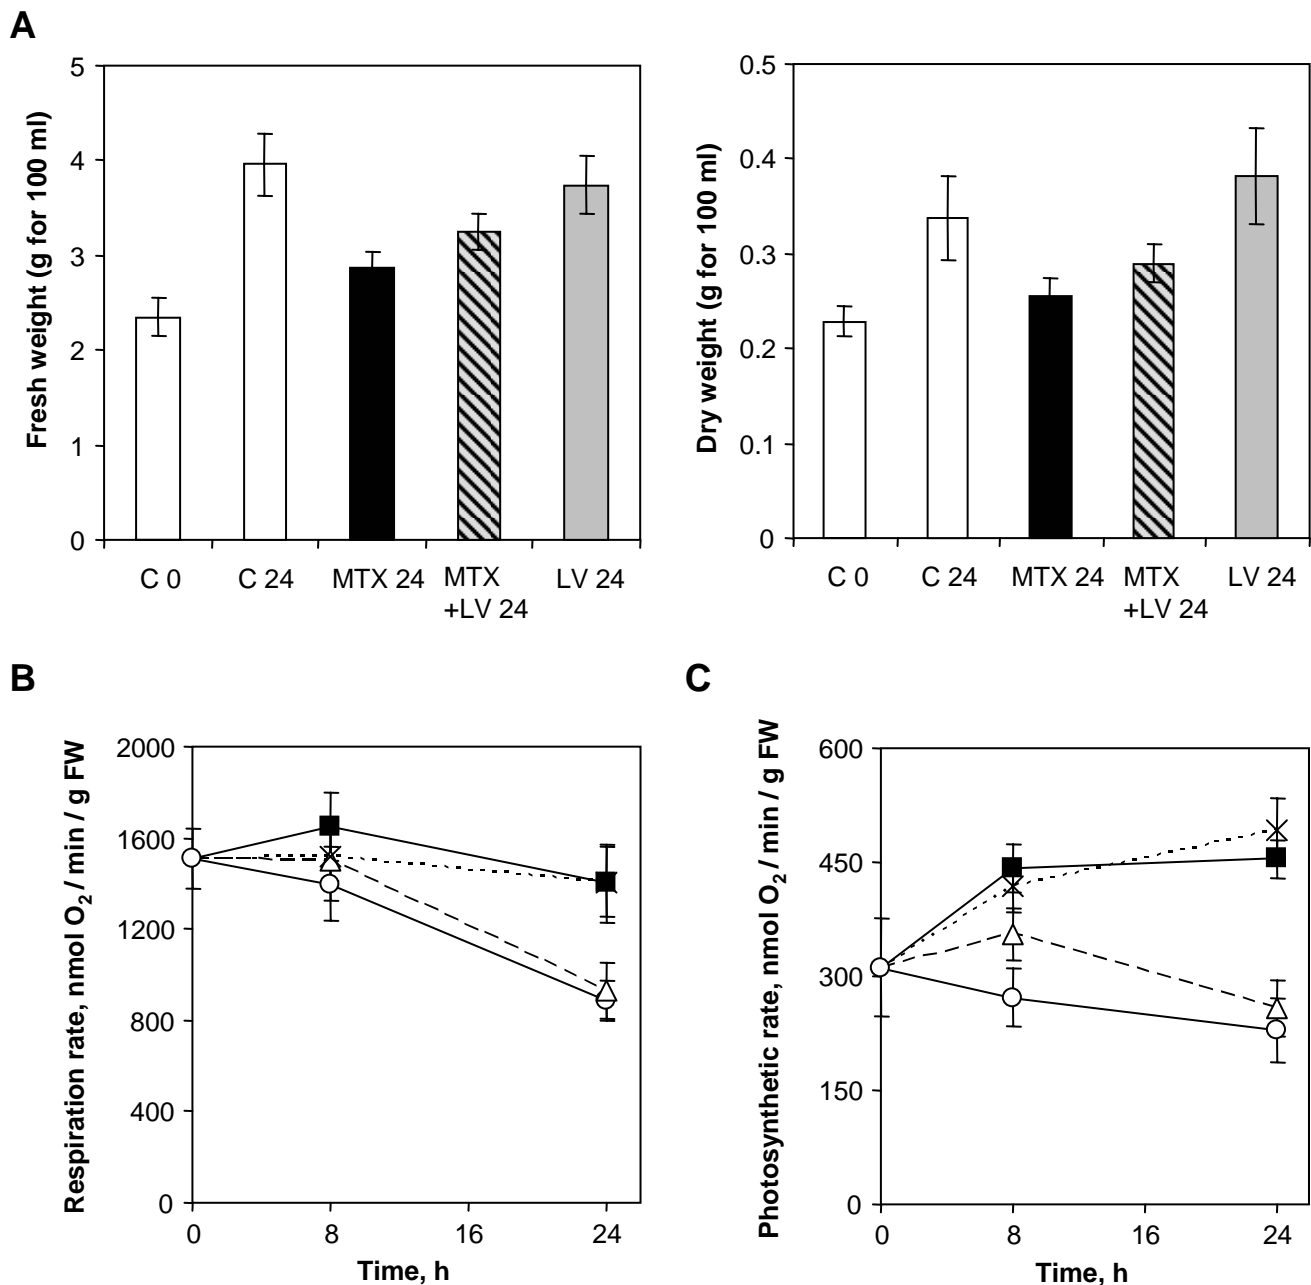

**Supplemental Figure S1. Physiological parameters of Arabidopsis cells treated with MTX and leucovorin.** Cells were grown for up to 24h in standard conditions or in the presence of MTX (100  $\mu$ M) and leucovorin (LV, 500  $\mu$ M), alone or in combination. **A** – Cell growth was estimated through measurements of fresh and dry weights of cultures after 24h of exposure to the different chemicals. C0, control cells at time zero. **B**, **C** – Respiratory and photosynthetic rates were determined in freshly prepared culture medium containing 50 mM bicarbonate in the darkness or with a white light source of 2000  $\mu$ mol of photons.m<sup>-2</sup>.s<sup>-1</sup>, respectively. Control cells (■) and cells treated with MTX (○), MTX and LV (△), and LV (×) were analyzed after 0, 8, and 24h of treatment. Data are means of two biological replicates and SD.

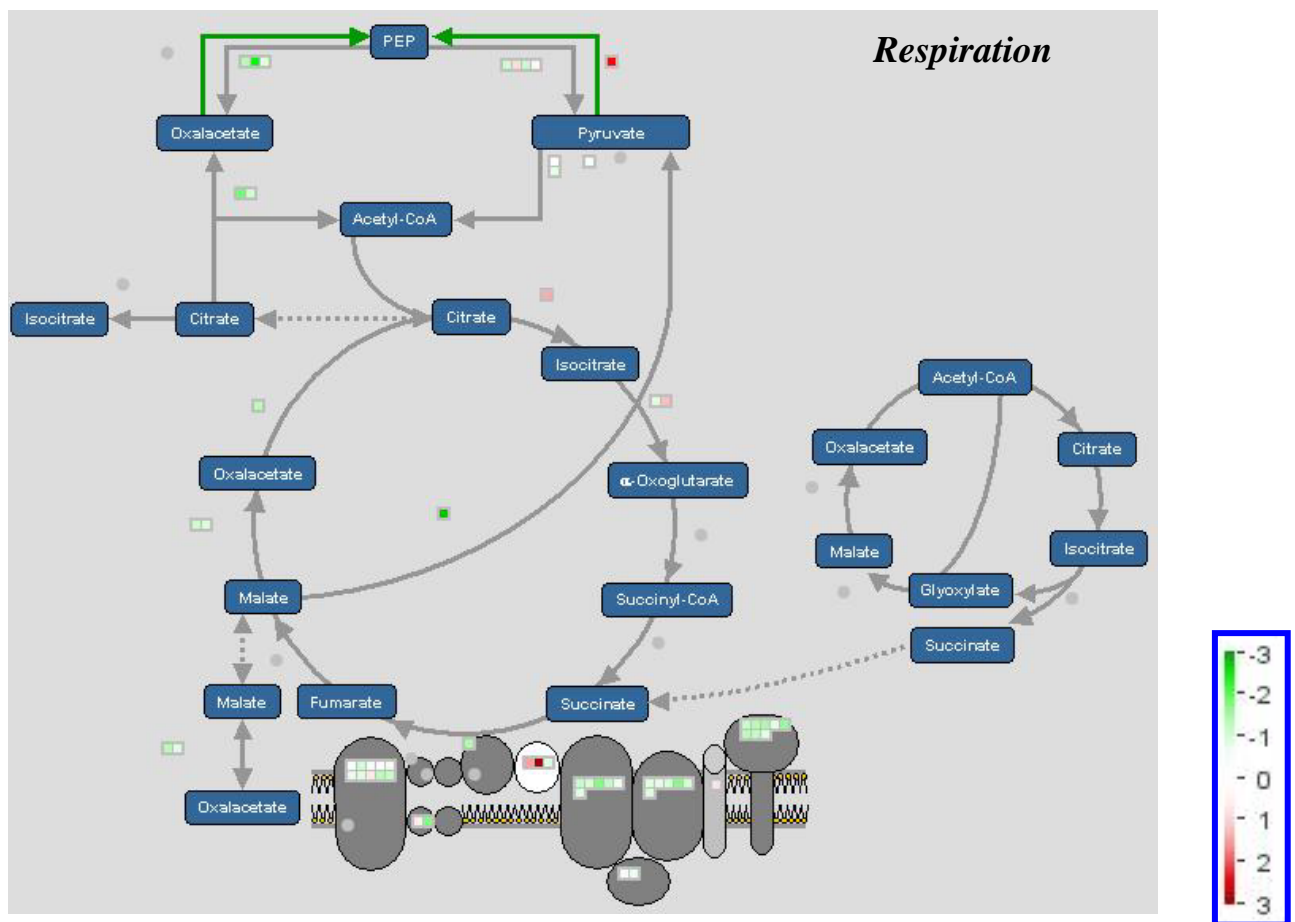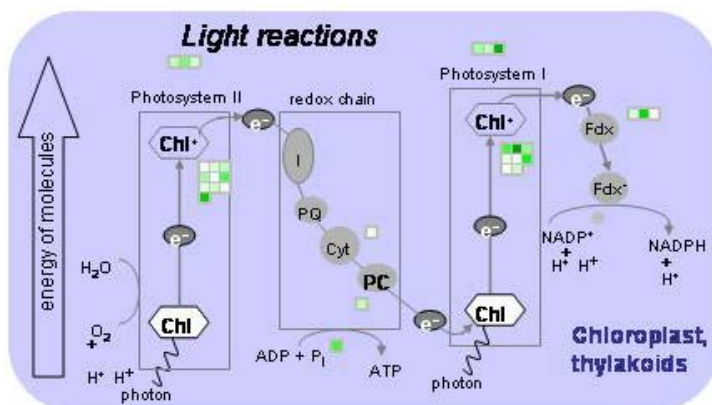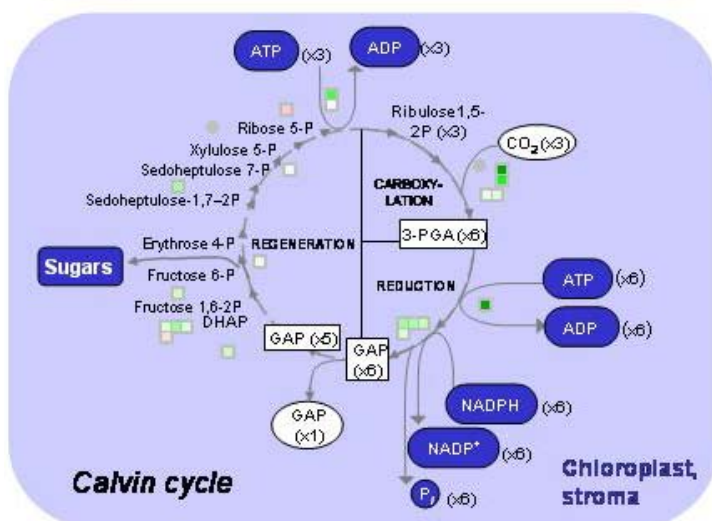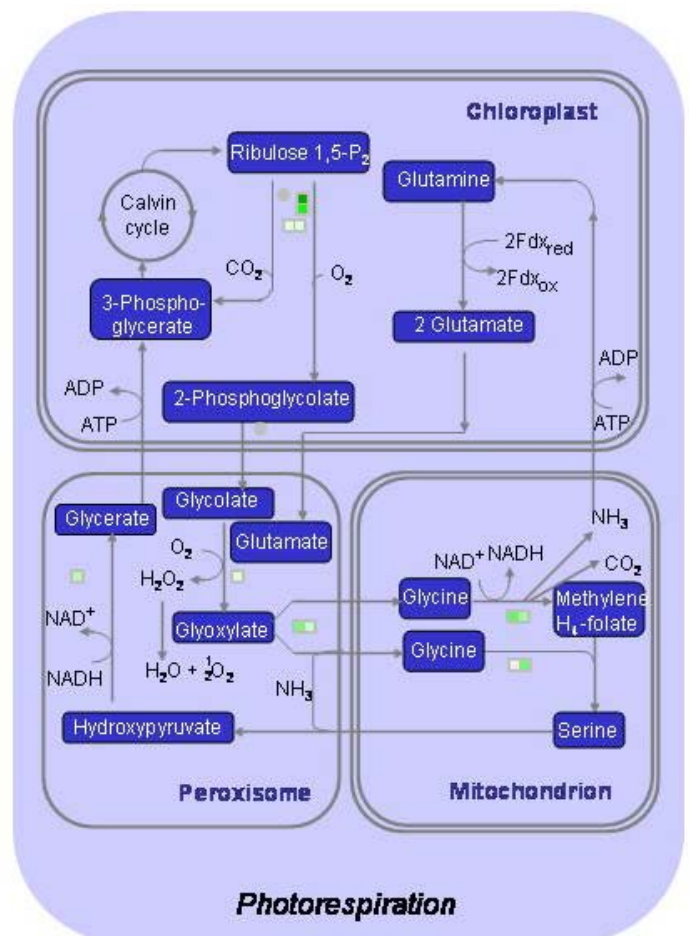

**Supplemental Figure S2. MapMan-generated overview of MTX-responsive genes involved in respiration and photosynthesis.** Genes that are differentially expressed between MTX-treated and control cells after 24h of treatment were analyzed using the MapMan tool with maps downloaded from the MapMan website (Thimm et al, 2004). Differentially expressed genes are represented by colored boxes according to the  $\log_2(\text{ratio})$  values. Genes induced by MTX are shown as red, the one repressed by MTX as green.

**Supplemental Table S1. Folate measurements in Arabidopsis cells used for the transcriptomic studies (A) and the rescue experiments (B).**

In two independent series of experiments, Arabidopsis cells were grown in standard conditions or exposed to MTX (100  $\mu$ M) and/or leucovorin (LV, 500  $\mu$ M) over a 24h period. Folates were analyzed by LC-MS/MS as described by Zhang et al. (2005). Using this procedure, 5,10-methylene-THF is converted to THF and 10-formyl-THF is oxidized to 10-formyl-folic acid or converted to 5,10-methenyl-THF (De Brouwer et al, 2007). Also, dihydrofolate is partly converted to folic acid or degraded. Values are in nmol folates or MTX per gram of fresh weight. Data are means of three biological replicates and SD. nd, not detected.

**A - Cells used for transcriptomic studies**

| Treatment | Time | THF + 5,10-methylene-THF | 5-methyl-THF    | 5-formyl-THF    | 10-formyl-folic acid | 5,10-methenyl-THF | Folic acid      | Total            | MTX             |
|-----------|------|--------------------------|-----------------|-----------------|----------------------|-------------------|-----------------|------------------|-----------------|
| Control   | 2 h  | 6.61 $\pm$ 0.38          | 2.38 $\pm$ 0.33 | 0.52 $\pm$ 0.16 | nd                   | 2.83 $\pm$ 1.22   | 0.03 $\pm$ 0.01 | 12.36 $\pm$ 2.10 | nd              |
|           | 6 h  | 7.67 $\pm$ 0.27          | 2.43 $\pm$ 0.46 | 0.58 $\pm$ 0.24 | nd                   | 2.52 $\pm$ 1.27   | 0.03 $\pm$ 0.01 | 13.23 $\pm$ 2.25 | nd              |
|           | 24 h | 6.13 $\pm$ 1.24          | 2.20 $\pm$ 0.36 | 0.47 $\pm$ 0.27 | nd                   | 2.49 $\pm$ 1.24   | 0.02 $\pm$ 0.01 | 11.32 $\pm$ 3.11 | nd              |
| + MTX     | 2 h  | 5.26 $\pm$ 1.28          | 0.92 $\pm$ 0.36 | 0.32 $\pm$ 0.10 | 0.07 $\pm$ 0.01      | 2.43 $\pm$ 0.90   | 0.67 $\pm$ 0.14 | 9.67 $\pm$ 2.80  | 5.72 $\pm$ 0.90 |
|           | 6 h  | 3.36 $\pm$ 1.78          | 0.14 $\pm$ 0.03 | 0.16 $\pm$ 0.07 | 0.09 $\pm$ 0.02      | 1.40 $\pm$ 0.53   | 0.49 $\pm$ 0.05 | 5.77 $\pm$ 2.69  | 9.47 $\pm$ 1.04 |
|           | 24 h | 1.79 $\pm$ 0.43          | 0.01 $\pm$ 0.00 | 0.06 $\pm$ 0.03 | 0.03 $\pm$ 0.01      | 0.43 $\pm$ 0.19   | 0.27 $\pm$ 0.04 | 2.60 $\pm$ 0.69  | 8.51 $\pm$ 0.82 |

**B - Cells used for rescue experiments**

| Treatment  | Time | THF + 5,10-methylene-THF | 5-methyl-THF     | 5-formyl-THF     | 10-formyl-folic acid | 5,10-methenyl-THF | Folic acid      | Total             | MTX              |
|------------|------|--------------------------|------------------|------------------|----------------------|-------------------|-----------------|-------------------|------------------|
| Control    | 6 h  | 3.67 $\pm$ 0.93          | 6.38 $\pm$ 0.60  | 1.84 $\pm$ 0.38  | 0.03 $\pm$ 0.02      | 5.40 $\pm$ 0.70   | 0.01 $\pm$ 0.00 | 17.32 $\pm$ 2.63  | nd               |
|            | 12 h | 2.91 $\pm$ 0.76          | 6.33 $\pm$ 0.76  | 2.03 $\pm$ 0.44  | 0.17 $\pm$ 0.19      | 6.05 $\pm$ 1.31   | 0.01 $\pm$ 0.00 | 17.50 $\pm$ 3.47  | nd               |
|            | 24 h | 2.09 $\pm$ 0.30          | 7.22 $\pm$ 1.20  | 2.19 $\pm$ 0.73  | 0.34 $\pm$ 0.07      | 6.09 $\pm$ 0.32   | 0.03 $\pm$ 0.01 | 17.96 $\pm$ 2.63  | nd               |
| + MTX      | 6 h  | 1.76 $\pm$ 0.39          | 2.00 $\pm$ 0.43  | 0.61 $\pm$ 0.15  | 0.11 $\pm$ 0.07      | 1.59 $\pm$ 0.53   | 0.66 $\pm$ 0.06 | 6.73 $\pm$ 1.62   | 8.23 $\pm$ 1.60  |
|            | 12 h | 0.57 $\pm$ 0.24          | 0.53 $\pm$ 0.08  | 0.32 $\pm$ 0.08  | 0.08 $\pm$ 0.04      | 0.59 $\pm$ 0.21   | 0.45 $\pm$ 0.07 | 2.54 $\pm$ 0.73   | 10.26 $\pm$ 3.15 |
|            | 24 h | 0.33 $\pm$ 0.15          | 0.13 $\pm$ 0.04  | 0.23 $\pm$ 0.03  | 0.03 $\pm$ 0.01      | 0.25 $\pm$ 0.06   | 0.34 $\pm$ 0.06 | 1.30 $\pm$ 0.35   | 11.05 $\pm$ 1.86 |
| + MTX + LV | 6 h  | 2.26 $\pm$ 0.68          | 3.74 $\pm$ 0.63  | 6.58 $\pm$ 1.70  | 0.36 $\pm$ 0.12      | 2.07 $\pm$ 0.66   | 0.84 $\pm$ 0.19 | 15.86 $\pm$ 3.98  | 9.00 $\pm$ 0.70  |
|            | 12 h | 1.58 $\pm$ 0.36          | 2.37 $\pm$ 0.77  | 12.58 $\pm$ 0.93 | 0.20 $\pm$ 0.22      | 3.38 $\pm$ 0.38   | 0.69 $\pm$ 0.05 | 20.79 $\pm$ 2.70  | 16.17 $\pm$ 0.28 |
|            | 24 h | 1.16 $\pm$ 0.12          | 2.86 $\pm$ 0.42  | 16.83 $\pm$ 0.58 | 0.09 $\pm$ 0.06      | 1.10 $\pm$ 0.47   | 0.58 $\pm$ 0.04 | 22.63 $\pm$ 1.68  | 20.60 $\pm$ 1.44 |
| + LV       | 6 h  | 5.25 $\pm$ 0.99          | 7.45 $\pm$ 0.34  | 11.12 $\pm$ 1.17 | 0.05 $\pm$ 0.02      | 7.58 $\pm$ 0.78   | 0.02 $\pm$ 0.01 | 31.47 $\pm$ 3.30  | nd               |
|            | 12 h | 4.25 $\pm$ 1.04          | 11.59 $\pm$ 3.38 | 15.35 $\pm$ 0.69 | 0.52 $\pm$ 0.73      | 10.14 $\pm$ 2.50  | 0.05 $\pm$ 0.02 | 41.90 $\pm$ 8.35  | nd               |
|            | 24 h | 4.65 $\pm$ 2.31          | 12.07 $\pm$ 2.27 | 26.46 $\pm$ 3.05 | 0.45 $\pm$ 0.28      | 12.31 $\pm$ 4.96  | 0.10 $\pm$ 0.03 | 56.04 $\pm$ 12.90 | nd               |

**Supplemental Table S2. Validation of the microarray data by quantitative RT-PCR.**

Microarray data were obtained from comparisons between MTX-treated and control cells after 2, 6, and 24h of treatment (see Fig. 2). A statistical cut-off  $P < 0.05$  after Bonferroni correction was used to determine which genes were differentially expressed in response to MTX. The average ratio (MTX vs. control transcript levels) and  $P$ -value for 2 independent biological repeats of the experiment is shown. Real-time qPCR was done as described in the Materials and methods section. Values  $\pm$  SD correspond to relative transcript levels in treated vs. control cells, as determined for 3 biological repeats.

| Accession number | Gene description                                | Gene name | Microarray data  |          |                  |          |                   |          | Quantitative RT-PCR |                  |                   |
|------------------|-------------------------------------------------|-----------|------------------|----------|------------------|----------|-------------------|----------|---------------------|------------------|-------------------|
|                  |                                                 |           | MTX / control 2h |          | MTX / control 6h |          | MTX / control 24h |          | MTX / control 2h    | MTX / control 6h | MTX / control 24h |
|                  |                                                 |           | Ratio            | P-value  | Ratio            | P-value  | Ratio             | P-value  | Ratio $\pm$ SD      | Ratio $\pm$ SD   | Ratio $\pm$ SD    |
| AT1G19770        | purine permease                                 | PUP 14    | 0.93             | 1.00E+00 | 14.37            | 0.00E+00 | 1.00              | 1.00E+00 | 1.33 $\pm$ 0.21     | 27.65 $\pm$ 4.31 | 2.02 $\pm$ 0.37   |
| AT1G36370        | serine hydroxymethyltransferase (plastidial)    | cpSHMT    | 0.94             | 1.00E+00 | 8.21             | 0.00E+00 | 1.49              | 1.00E+00 | 1.21 $\pm$ 0.20     | 8.85 $\pm$ 1.23  | 4.73 $\pm$ 0.90   |
| AT1G50480        | 10-formyltetrahydrofolate synthetase            | FTHFS     | 1.21             | 1.00E+00 | 8.42             | 0.00E+00 | 1.74              | 1.13E-02 | 1.31 $\pm$ 0.20     | 4.3 $\pm$ 0.52   | 1.69 $\pm$ 0.19   |
| AT1G74590        | glutathione transferase                         | GSTU10    | 1.04             | 1.00E+00 | 3.06             | 0.00E+00 | 8.26              | 0.00E+00 | 1.16 $\pm$ 0.75     | 3.00 $\pm$ 0.70  | 16.70 $\pm$ 1.71  |
| AT3G02470        | S-adenosylmethionine decarboxylase              | SAMdc     | 1.26             | 1.00E+00 | 4.34             | 0.00E+00 | 7.24              | 0.00E+00 | 1.39 $\pm$ 0.17     | 2.18 $\pm$ 0.25  | 11.89 $\pm$ 2.86  |
| AT3G22370        | alternative oxidase 1a                          | AOX1a     | 1.07             | 1.00E+00 | 18.62            | 0.00E+00 | 11.82             | 0.00E+00 | 1.04 $\pm$ 0.21     | 28.82 $\pm$ 5.62 | 16.59 $\pm$ 3.57  |
| AT3G23810        | S-adenosyl-L-homocysteine hydrolase             | SAHH2     | 1.08             | 1.00E+00 | 0.77             | 1.00E+00 | 0.31              | 0.00E+00 | 1.38 $\pm$ 0.44     | 1.02 $\pm$ 0.19  | 0.59 $\pm$ 0.16   |
| AT3G55630        | folypolyglutamate synthetase (cytosolic)        | FPGSD     | 1.00             | 1.00E+00 | 2.49             | 0.00E+00 | 0.57              | 1.09E-02 | 1.23 $\pm$ 0.22     | 4.93 $\pm$ 0.31  | 0.90 $\pm$ 0.27   |
| AT4G04610        | 5'-adenylylsulfate reductase                    | APR1      | 0.98             | 1.00E+00 | 19.83            | 0.00E+00 | 3.17              | 0.00E+00 | 2.24 $\pm$ 0.48     | 28.28 $\pm$ 9.55 | 5.21 $\pm$ 2.48   |
| AT4G37930        | serine hydroxymethyltransferase (mitochondrial) | mtSHMT    | 0.96             | 1.00E+00 | 0.75             | 1.00E+00 | 0.28              | 0.00E+00 | 1.00 $\pm$ 0.15     | 1.08 $\pm$ 0.28  | 0.49 $\pm$ 0.08   |
| AT5G10180        | sulfate transporter                             | SULTR2.1  | 0.92             | 1.00E+00 | 1.48             | 1.00E+00 | 0.39              | 0.00E+00 | 0.94 $\pm$ 0.09     | 2.16 $\pm$ 0.40  | 0.35 $\pm$ 0.02   |
| AT5G17920        | vitamin-B12-independent methionine synthase     | MS1       | 1.03             | 1.00E+00 | 1.11             | 1.00E+00 | 0.48              | 8.71E-07 | 0.79 $\pm$ 0.17     | 1.13 $\pm$ 0.32  | 0.51 $\pm$ 0.06   |

### Supplemental Table S3. Selected MTX-responsive genes that may be involved in the regulation of cell cycle and response to stress.

Microarray data are expressed in log<sub>2</sub>(ratio) obtained from comparisons between MTX-treated and control cells after 2, 6, and 24h of treatment (see Fig. 2). A statistical cut-off  $P < 0.05$  after Bonferroni correction was used to determine which genes were differentially expressed in response to MTX. Positive (red boxes) and negative (green boxes) ratio indicate that the genes are induced or repressed by MTX, respectively. The average log<sub>2</sub>(ratio) and P-value for 2 independent biological repeats of the experiment is shown.

| Accession number                         | Gene description                                                                                            | MTX / control 2h         |         | MTX / control 6h         |          | MTX / control 24h        |         |
|------------------------------------------|-------------------------------------------------------------------------------------------------------------|--------------------------|---------|--------------------------|----------|--------------------------|---------|
|                                          |                                                                                                             | log <sub>2</sub> (ratio) | P-value | log <sub>2</sub> (ratio) | P-value  | log <sub>2</sub> (ratio) | P-value |
| <b>Cell cycle</b>                        |                                                                                                             |                          |         |                          |          |                          |         |
| AT1G76540                                | CDKB2;1; kinase_ cell division control protein, putative                                                    | -0.03                    | 1.00E+0 | -0.32                    | 1.00E+0  | -1.60                    | 0.00E+0 |
| AT2G27960                                | CKS1; cyclin-dependent protein kinase_ cyclin-dependent kinase / CDK (CKS1)                                 | 0.04                     | 1.00E+0 | -1.61                    | 0.00E+0  | -1.56                    | 0.00E+0 |
| AT2G27970                                | CKS2; cyclin-dependent protein kinase_ cyclin-dependent kinase, putative / CDK, putative                    | 0.10                     | 1.00E+0 | -0.96                    | 1.74E-7  | -2.26                    | 0.00E+0 |
| AT1G44110                                | CYCA1;1; cyclin-dependent protein kinase regulator                                                          | 0.11                     | 1.00E+0 | -0.12                    | 1.00E+0  | -1.98                    | 0.00E+0 |
| AT2G26760                                | CYCB1;4 (CYCLIN 3); cyclin-dependent protein kinase regulator                                               | 0.03                     | 1.00E+0 | -0.12                    | 1.00E+0  | -2.14                    | 0.00E+0 |
| AT2G17620                                | CYCB2;1; cyclin-dependent protein kinase regulator                                                          | -0.13                    | 1.00E+0 | -0.36                    | 1.00E+0  | -1.11                    | 6.37E-8 |
| AT5G03455                                | CDC25_ rhodanese-like domain-containing protein                                                             | 0.06                     | 1.00E+0 | -1.44                    | 0.00E+0  | -0.84                    | 3.41E-3 |
| AT5G42190                                | ASK2 (ARABIDOPSIS SKP1-LIKE 2); ubiquitin-protein ligase_ E3 ubiquitin ligase SCF complex subunit SKP1/ASK1 | -0.10                    | 1.00E+0 | 0.39                     | 1.00E+0  | -1.50                    | 0.00E+0 |
| AT1G75950                                | SKP1 ; ubiquitin-protein ligase_ E3 ubiquitin ligase SCF complex subunit SKP1/ASK1                          | 0.10                     | 1.00E+0 | -1.15                    | 5.62E-12 | -0.05                    | 1.00E+0 |
| AT1G07370                                | PCNA1 (PROLIFERATING CELLULAR NUCLEAR ANTIGEN)                                                              | 0.10                     | 1.00E+0 | -0.54                    | 1.00E+0  | -1.65                    | 0.00E+0 |
| AT2G30410                                | KIS (KIESEL); unfolded protein binding_ tubulin folding cofactor A (KIESEL)                                 | 0.01                     | 1.00E+0 | -1.08                    | 3.49E-10 | -1.72                    | 0.00E+0 |
| AT5G23860                                | TUB8_ tubulin beta-8 chain (TUB8) (TUBB8)                                                                   | 0.06                     | 1.00E+0 | -0.84                    | 5.31E-5  | -1.42                    | 0.00E+0 |
| AT5G12250                                | TUB6 (BETA-6 TUBULIN)_ tubulin beta-6 chain (TUB6)                                                          | 0.00                     | 1.00E+0 | -0.70                    | 1.49E-2  | -1.56                    | 0.00E+0 |
| AT4G14960                                | TUA6_ tubulin alpha-6 chain (TUA6)                                                                          | -0.01                    | 1.00E+0 | 0.10                     | 1.00E+0  | -2.76                    | 0.00E+0 |
| AT4G20890                                | TUB9; GTP binding / GTPase/ structural molecule_ tubulin beta-9 chain (TUB9)                                | 0.01                     | 1.00E+0 | -0.42                    | 1.00E+0  | -1.10                    | 1.22E-7 |
| AT2G29550                                | TUB7_ tubulin beta-7 chain (TUB7)                                                                           | 0.02                     | 1.00E+0 | -0.55                    | 1.00E+0  | -3.32                    | 0.00E+0 |
| AT1G04820                                | TUA4_ tubulin alpha-2/alpha-4 chain (TUA4)                                                                  | 0.07                     | 1.00E+0 | -0.18                    | 1.00E+0  | -3.99                    | 0.00E+0 |
| AT1G50010                                | TUA2 unknown protein                                                                                        | 0.04                     | 1.00E+0 | -0.20                    | 1.00E+0  | -3.58                    | 0.00E+0 |
| <b>Alternative oxidases</b>              |                                                                                                             |                          |         |                          |          |                          |         |
| AT1G32350                                | alternative oxidase 1d (AOX1D)                                                                              | 0.10                     | 1.00E+0 | 0.89                     | 4.20E-6  | 1.49                     | 0.00E+0 |
| AT3G22370                                | alternative oxidase 1a (AOX1A)                                                                              | 0.10                     | 1.00E+0 | 4.22                     | 0.00E+0  | 3.56                     | 0.00E+0 |
| <b>Ethylene and polyamine metabolism</b> |                                                                                                             |                          |         |                          |          |                          |         |
| AT4G26200                                | 1-aminocyclopropane-1-carboxylate synthase, putative / ACC synthase 7 (ACS7)                                | 0.13                     | 1.00E+0 | 3.77                     | 0.00E+0  | 2.61                     | 0.00E+0 |
| AT1G01480                                | 1-aminocyclopropane-1-carboxylate synthase 2 / ACC synthase 2 (ACS2)                                        | 0.09                     | 1.00E+0 | 3.59                     | 0.00E+0  | 2.73                     | 0.00E+0 |
| AT1G62380                                | 1-aminocyclopropane-1-carboxylate (ACC) oxidase (ACO2)                                                      | 0.11                     | 1.00E+0 | -1.10                    | 1.24E-10 | -1.36                    | 0.00E+0 |
| AT2G25450                                | 1-aminocyclopropane-1-carboxylate (ACC) oxidase                                                             | -0.10                    | 1.00E+0 | 0.46                     | 1.00E+0  | 2.22                     | 0.00E+0 |
| AT5G43450                                | 1-aminocyclopropane-1-carboxylate (ACC) oxidase                                                             | -0.01                    | 1.00E+0 | 2.93                     | 0.00E+0  | 1.42                     | 0.00E+0 |
| AT1G05010                                | 1-aminocyclopropane-1-carboxylate (ACC) oxidase (EFE)                                                       | 0.03                     | 1.00E+0 | 1.57                     | 0.00E+0  | 0.73                     | 9.26E-2 |
| AT3G45410                                | Ethylene receptor                                                                                           | 0.08                     | 1.00E+0 | 1.29                     | 0.00E+0  | 0.95                     | 4.99E-5 |
| AT5G15950                                | S-adenosylmethionine decarboxylase                                                                          | -0.06                    | 1.00E+0 | 0.56                     | 1.00E+0  | 1.69                     | 0.00E+0 |
| AT3G02470                                | S-adenosylmethionine decarboxylase                                                                          | 0.34                     | 1.00E+0 | 2.12                     | 0.00E+0  | 2.86                     | 0.00E+0 |
| AT2G16500                                | arginine decarboxylase (ADC1)                                                                               | 0.35                     | 1.00E+0 | 1.02                     | 7.13E-9  | 1.51                     | 0.00E+0 |
| AT4G34710                                | arginine decarboxylase (ADC2)                                                                               | 0.20                     | 1.00E+0 | -0.32                    | 1.00E+0  | 1.14                     | 1.89E-8 |
| <b>Cytochrome P450 family</b>            |                                                                                                             |                          |         |                          |          |                          |         |
| AT5G42580                                | a member of the cytochrome P450 family                                                                      | 0.10                     | 1.00E+0 | -1.08                    | 2.81E-10 | -0.01                    | 1.00E+0 |
| AT5G45340                                | CYP707A3; heme binding / iron ion binding / monooxygenase/ oxygen binding                                   | -0.06                    | 1.00E+0 | 1.37                     | 0.00E+0  | -0.46                    | 1.00E+0 |
| AT2G34500                                | CYP710A1; heme binding / iron ion binding / monooxygenase/ oxygen binding                                   | -0.11                    | 1.00E+0 | -0.52                    | 1.00E+0  | 2.22                     | 0.00E+0 |
| AT2G34490                                | CYP710A2; heme binding / iron ion binding / monooxygenase/ oxygen binding                                   | 0.10                     | 1.00E+0 | -1.51                    | 0.00E+0  | -1.16                    | 6.82E-9 |
| AT4G39950                                | CYP79B2; heme binding / iron ion binding / monooxygenase/ oxygen binding                                    | -0.11                    | 1.00E+0 | 0.67                     | 4.66E-2  | 2.44                     | 0.00E+0 |

|           |                                 |       |         |       |          |       |         |
|-----------|---------------------------------|-------|---------|-------|----------|-------|---------|
| AT2G24180 | cytochrome P450 monooxygenase   | 0.09  | 1.00E+0 | 1.19  | 0.00E+0  | 1.46  | 0.00E+0 |
| AT1G64900 | cytochrome P450 (CYP89A2).      | -0.18 | 1.00E+0 | 0.58  | 8.12E-1  | 1.33  | 0.00E+0 |
| AT4G30210 | NADPH-cytochrome P450 reductase | -0.12 | 1.00E+0 | 1.74  | 0.00E+0  | -0.57 | 1.00E+0 |
| AT2G45510 | member of CYP704A               | -0.01 | 1.00E+0 | -0.83 | 6.90E-5  | -1.05 | 1.06E-6 |
| AT3G20960 | member of CYP705A               | -0.08 | 1.00E+0 | 0.27  | 1.00E+0  | 1.10  | 1.00E-7 |
| AT4G27710 | member of CYP709B               | -0.09 | 1.00E+0 | 1.07  | 5.17E-10 | 0.26  | 1.00E+0 |
| AT4G37320 | member of CYP81D                | -0.10 | 1.00E+0 | 1.14  | 5.62E-12 | 0.22  | 1.00E+0 |
| AT5G57220 | member of CYP81F                | -0.05 | 1.00E+0 | 2.88  | 0.00E+0  | 0.59  | 1.00E+0 |
| AT4G31500 | oxime-metabolizing enzyme       | -0.06 | 1.00E+0 | 1.32  | 0.00E+0  | -1.19 | 1.36E-9 |

#### Glutathione S-transferases

|           |                                                             |       |         |       |          |       |          |
|-----------|-------------------------------------------------------------|-------|---------|-------|----------|-------|----------|
| AT1G69930 | glutathione transferase belonging to the tau class of GSTs  | -0.09 | 1.00E+0 | 2.72  | 0.00E+0  | 3.70  | 0.00E+0  |
| AT1G74590 | glutathione transferase belonging to the tau class of GSTs  | 0.05  | 1.00E+0 | 1.62  | 0.00E+0  | 3.05  | 0.00E+0  |
| AT4G02520 | glutathione transferase belonging to the phi class of GSTs. | 0.01  | 1.00E+0 | 1.42  | 0.00E+0  | 3.34  | 0.00E+0  |
| AT1G78370 | glutathione transferase belonging to the tau class of GSTs  | 0.02  | 1.00E+0 | 1.34  | 0.00E+0  | 0.66  | 8.69E-1  |
| AT2G47730 | glutathione transferase belonging to the phi class of GSTs  | 0.01  | 1.00E+0 | 1.02  | 7.35E-9  | 0.50  | 1.00E+0  |
| AT2G29420 | glutathione transferase belonging to the tau class of GSTs  | 0.05  | 1.00E+0 | 0.65  | 8.71E-2  | 1.51  | 0.00E+0  |
| AT3G09270 | glutathione transferase belonging to the tau class of GSTs  | -0.07 | 1.00E+0 | 0.59  | 5.95E-1  | 1.82  | 0.00E+0  |
| AT1G78380 | glutathione transferase belonging to the tau class of GSTs  | -0.04 | 1.00E+0 | 0.02  | 1.00E+0  | 1.53  | 0.00E+0  |
| AT1G17190 | glutathione transferase belonging to the tau class of GSTs  | -0.01 | 1.00E+0 | -1.11 | 4.50E-11 | -1.26 | 5.04E-11 |

#### Glucosyl- and sulfo-transferases

|           |                                                          |       |         |       |         |      |          |
|-----------|----------------------------------------------------------|-------|---------|-------|---------|------|----------|
| AT2G28080 | glycosyltransferase family protein                       | 0.15  | 1.00E+0 | 0.65  | 8.96E-2 | 1.60 | 0.00E+0  |
| AT1G05670 | UDP-glucuronosyl/UDP-glucosyl transferase family protein | 0.06  | 1.00E+0 | 3.08  | 0.00E+0 | 3.50 | 0.00E+0  |
| AT5G12890 | UDP-glucuronosyl/UDP-glucosyl transferase family protein | 0.13  | 1.00E+0 | 1.89  | 0.00E+0 | 1.17 | 4.03E-9  |
| AT1G07240 | UDP-glucuronosyl/UDP-glucosyl transferase family protein | -0.03 | 1.00E+0 | 1.74  | 0.00E+0 | 1.25 | 7.85E-11 |
| AT1G07260 | UDP-glucuronosyl/UDP-glucosyl transferase family protein | -0.10 | 1.00E+0 | 0.59  | 6.73E-1 | 1.08 | 2.68E-7  |
| AT3G11340 | UDP-glucuronosyl/UDP-glucosyl transferase family protein | -0.29 | 1.00E+0 | 0.52  | 1.00E+0 | 3.32 | 0.00E+0  |
| AT3G21800 | UDP-glucuronosyl/UDP-glucosyl transferase family protein | 0.00  | 1.00E+0 | 0.16  | 1.00E+0 | 1.33 | 0.00E+0  |
| AT2G30140 | UDP-glucuronosyl/UDP-glucosyl transferase family protein | 0.04  | 1.00E+0 | -0.10 | 1.00E+0 | 1.34 | 0.00E+0  |
| AT3G21780 | UDP-glucosyl transferase                                 | -0.02 | 1.00E+0 | 0.33  | 1.00E+0 | 1.55 | 0.00E+0  |
| AT2G15490 | UGT73B4; UDP-glycosyltransferase                         | -0.28 | 1.00E+0 | 3.31  | 0.00E+0 | 3.03 | 0.00E+0  |
| AT1G74100 | sulfotransferase family protein                          | -0.10 | 1.00E+0 | 1.40  | 0.00E+0 | 0.62 | 1.00E+0  |
| AT2G03760 | High similarity to flavonol sulfotransferases (FSTs)     | 0.08  | 1.00E+0 | -0.39 | 1.00E+0 | 5.31 | 0.00E+0  |

#### ABC transporters and MATE efflux proteins

|           |                                                                              |       |         |       |          |       |         |
|-----------|------------------------------------------------------------------------------|-------|---------|-------|----------|-------|---------|
| AT1G30400 | MRP1, glutathione S-conjugate transporting ATPase (tonoplast)                | 0.03  | 1.00E+0 | -0.28 | 1.00E+0  | -0.02 | 1.00E+0 |
| AT2G47800 | MRP4, ATPase transporter, multidrug transport (plasma membrane)              | 0.05  | 1.00E+0 | -0.07 | 1.00E+0  | 0.15  | 1.00E+0 |
| AT3G62150 | MDR17 multidrug resistance transporter                                       | 0.02  | 1.00E+0 | 1.14  | 1.12E-11 | 0.07  | 1.00E+0 |
| AT2G47000 | MDR4 multidrug resistance transporter                                        | 0.01  | 1.00E+0 | 1.96  | 0.00E+0  | 0.55  | 1.00E+0 |
| AT1G02520 | MDR8 multidrug resistance transporter                                        | -0.08 | 1.00E+0 | 2.88  | 0.00E+0  | 1.09  | 1.51E-7 |
| AT2G34660 | MRP2 multidrug resistance protein                                            | 0.09  | 1.00E+0 | -0.21 | 1.00E+0  | 1.11  | 7.47E-8 |
| AT3G13080 | MRP3 multidrug resistance protein                                            | -     | -       | 1.36  | 0.00E+0  | 0.86  | 1.60E-3 |
| AT1G04120 | MRP5 multidrug resistance protein                                            | 0.06  | 1.00E+0 | -0.45 | 1.00E+0  | -1.02 | 3.01E-6 |
| AT2G37280 | PDR5 pleiotropic drug resistance                                             | 0.09  | 1.00E+0 | -0.17 | 1.00E+0  | -1.66 | 0.00E+0 |
| AT1G59870 | PDR8 pleiotropic drug resistance                                             | 0.18  | 1.00E+0 | 2.19  | 0.00E+0  | 0.62  | 1.00E+0 |
| AT5G39040 | TAP2 transporter antigen processing                                          | -0.10 | 1.00E+0 | 0.85  | 2.85E-5  | 2.21  | 0.00E+0 |
| AT3G25620 | WBC21 white-brown complex homolog                                            | 0.08  | 1.00E+0 | 0.28  | 1.00E+0  | 1.01  | 4.96E-6 |
| AT3G52310 | WBC28 white-brown complex homolog                                            | 0.05  | 1.00E+0 | 2.29  | 0.00E+0  | -2.07 | 0.00E+0 |
| AT2G38330 | antiporter/ drug transporter/ transporter DNA binding / transcription factor | -0.10 | 1.00E+0 | 0.91  | 1.94E-6  | 1.18  | 2.70E-9 |
| AT1G61890 | antiporter/ drug transporter/ transporter_ MATE efflux family protein        | 0.07  | 1.00E+0 | 2.68  | 0.00E+0  | 0.08  | 1.00E+0 |
| AT2G04100 | antiporter/ drug transporter/ transporter_ MATE efflux family protein        | 0.04  | 1.00E+0 | 1.83  | 0.00E+0  | -0.03 | 1.00E+0 |
| AT1G71140 | antiporter/ drug transporter/ transporter_ MATE efflux family protein        | 0.04  | 1.00E+0 | 0.05  | 1.00E+0  | 2.93  | 0.00E+0 |
| AT4G39030 | EDS5 enhanced disease susceptibility protein 5                               | -0.04 | 1.00E+0 | 1.69  | 0.00E+0  | 3.58  | 0.00E+0 |
| AT1G58340 | ZF14; antiporter/ drug transporter/ transporter_ MATE efflux protein-related | -0.05 | 1.00E+0 | 0.22  | 1.00E+0  | 1.33  | 0.00E+0 |

## Supplemental Table S4. Expression of genes associated with C1-metabolism in Arabidopsis cells treated with MTX

Microarray data are expressed in log<sub>2</sub>(ratio) obtained from comparisons between MTX-treated and control cells after 2, 6, and 24h of treatment (see Fig. 2). A statistical cut-off  $P < 0.05$  after Bonferroni correction was used to determine which genes were differentially expressed in response to MTX. Positive (red boxes) and negative (green boxes) ratio indicate that the genes are induced or repressed by MTX, respectively. The average log<sub>2</sub>(ratio) and P-value for 2 independent biological repeats of the experiment is shown.

| Accession number                                | Gene name   | Gene description                                          | MTX / control 2h         |         | MTX / control 6h         |         | MTX / control 24h        |         |
|-------------------------------------------------|-------------|-----------------------------------------------------------|--------------------------|---------|--------------------------|---------|--------------------------|---------|
|                                                 |             |                                                           | log <sub>2</sub> (ratio) | P-value | log <sub>2</sub> (ratio) | P-value | log <sub>2</sub> (ratio) | P-value |
| <b>THF synthesis, degradation and recycling</b> |             |                                                           |                          |         |                          |         |                          |         |
| AT2G28880                                       | ADCS        | ADC synthase                                              | -0.11                    | 1.00E+0 | 0.03                     | 1.00E+0 | 0.13                     | 1.00E+0 |
| AT5G57850                                       | ADCL        | ADC lyase                                                 | 0.05                     | 1.00E+0 | -0.10                    | 1.00E+0 | 0.07                     | 1.00E+0 |
| AT3G07270                                       | GTPCHI      | GTP cyclohydrolase I                                      | 0.10                     | 1.00E+0 | 0.45                     | 1.00E+0 | 0.37                     | 1.00E+0 |
| AT3G11750                                       | DHNA1       | Dihydroneopterin aldolase                                 | ns                       | ns      | ns                       | ns      | ns                       | ns      |
| AT5G62980                                       | DHNA2       | Dihydroneopterin aldolase                                 | 0.03                     | 1.00E+0 | -0.06                    | 1.00E+0 | 0.28                     | 1.00E+0 |
| AT3G21730                                       | DHNA3       | Dihydroneopterin aldolase                                 | ns                       | ns      | ns                       | ns      | ns                       | ns      |
| AT4G30000                                       | HPPK-DHPS 1 | Dihydropterin pyrophosphokinase-dihydropteroate synthase  | 0.07                     | 1.00E+0 | 0.03                     | 1.00E+0 | -0.04                    | 1.00E+0 |
| AT1G69190                                       | HPPK-DHPS 2 | Dihydropterin pyrophosphokinase-dihydropteroate synthase  | ns                       | ns      | ns                       | ns      | ns                       | ns      |
| AT5G41480                                       | DHFS        | Dihydrofolate synthetase                                  | -0.01                    | 1.00E+0 | 0.05                     | 1.00E+0 | -0.09                    | 1.00E+0 |
| AT2G16370                                       | DHFR-TS 1   | Dihydrofolate reductase-thymidylate synthase (thy1)       | 0.25                     | 1.00E+0 | 0.11                     | 1.00E+0 | 0.27                     | 1.00E+0 |
| AT2G21550                                       | DHFR-TS 3   | Dihydrofolate reductase-thymidylate synthase              | 0.02                     | 1.00E+0 | 0.30                     | 1.00E+0 | 0.08                     | 1.00E+0 |
| AT4G34570                                       | DHFR-TS 2   | Dihydrofolate reductase-thymidylate synthase (thy2)       | 0.04                     | 1.00E+0 | -0.07                    | 1.00E+0 | -0.05                    | 1.00E+0 |
| AT5G05980                                       | FPGS B      | Folypolyglutamate synthetase                              | 0.07                     | 1.00E+0 | -0.25                    | 1.00E+0 | -0.40                    | 1.00E+0 |
| AT3G10160                                       | FPGS C      | Folypolyglutamate synthetase                              | -0.01                    | 1.00E+0 | -0.83                    | 6.79E-5 | -0.30                    | 1.00E+0 |
| AT3G55630                                       | FPGS D      | Folypolyglutamate synthetase                              | 0.00                     | 1.00E+0 | 1.32                     | 0.00E+0 | -0.80                    | 1.09E-2 |
| AT1G78680                                       | GGH1        | Gamma-glutamyl hydrolase                                  | 0.05                     | 1.00E+0 | 0.17                     | 1.00E+0 | 0.34                     | 1.00E+0 |
| AT1G78660                                       | GGH2        | Gamma-glutamyl hydrolase                                  | 0.05                     | 1.00E+0 | 0.38                     | 1.00E+0 | 0.03                     | 1.00E+0 |
| AT1G78670                                       | GGH3        | Gamma-glutamyl hydrolase                                  | 0.15                     | 1.00E+0 | 0.28                     | 1.00E+0 | 0.23                     | 1.00E+0 |
| AT1G10310                                       |             | Pterin reductase                                          | -0.16                    | 1.00E+0 | -0.26                    | 1.00E+0 | -0.27                    | 1.00E+0 |
| <b>Synthesis and interconversion of C1-THF</b>  |             |                                                           |                          |         |                          |         |                          |         |
| AT1G50480                                       | FTHFS       | 10-formyl THF synthetase                                  | 0.28                     | 1.00E+0 | 3.07                     | 0.00E+0 | 0.80                     | 1.13E-2 |
| AT5G13050                                       | 5FCL        | 5-formyl THF cycloligase                                  | ns                       | ns      | ns                       | ns      | ns                       | ns      |
| AT2G38660                                       | DECY1       | Methylene THF dehydrogenase / methenyl THF cyclohydrolase | 0.01                     | 1.00E+0 | -0.38                    | 1.00E+0 | -0.42                    | 1.00E+0 |
| AT4G00620                                       | DECY2       | Methylene THF dehydrogenase / methenyl THF cyclohydrolase | 0.07                     | 1.00E+0 | -0.89                    | 1.85E-2 | -0.68                    | 4.89E-1 |
| AT3G12290                                       | DECY3       | Methylene THF dehydrogenase / methenyl THF cyclohydrolase | 0.03                     | 1.00E+0 | 0.17                     | 1.00E+0 | -0.04                    | 1.00E+0 |
| AT4G00600                                       | DECY4       | Methylene THF dehydrogenase / methenyl THF cyclohydrolase | ns                       | ns      | ns                       | ns      | ns                       | ns      |
| AT3G59970                                       | MTHFR 1     | Methylene THF reductase                                   | -0.01                    | 1.00E+0 | -0.26                    | 1.00E+0 | -1.12                    | 4.04E-8 |
| AT2G44160                                       | MTHFR 2     | Methylene THF reductase                                   | 0.08                     | 1.00E+0 | 0.01                     | 1.00E+0 | -1.62                    | 0.00E+0 |
| AT4G17360                                       | FTHFD1      | 10-formyl THF deformylase                                 | ns                       | ns      | ns                       | ns      | ns                       | ns      |
| AT5G47435                                       | FTHFD2      | 10-formyl THF deformylase                                 | -0.03                    | 1.00E+0 | 0.07                     | 1.00E+0 | -0.04                    | 1.00E+0 |
| AT1G66520                                       | PDE194      | formyltetrahydrofolate deformylase                        | ns                       | ns      | ns                       | ns      | ns                       | ns      |
| AT4G17360                                       |             | formyltetrahydrofolate deformylase                        | ns                       | ns      | ns                       | ns      | ns                       | ns      |
| AT5G47435                                       |             | formyltetrahydrofolate deformylase                        | -0.03                    | 1.00E+0 | 0.07                     | 1.00E+0 | -0.04                    | 1.00E+0 |
| AT4G37930                                       | SHMTmt1     | Serine hydroxymethyltransferase                           | -0.06                    | 1.00E+0 | -0.41                    | 1.00E+0 | -1.86                    | 0.00E+0 |
| AT5G26780                                       | SHMTmt2     | Serine hydroxymethyltransferase                           | 0.05                     | 1.00E+0 | -0.51                    | 1.00E+0 | -0.42                    | 1.00E+0 |
| AT4G32520                                       | SHMTcp1     | Serine hydroxymethyltransferase                           | 0.07                     | 1.00E+0 | -0.36                    | 1.00E+0 | 0.27                     | 1.00E+0 |
| AT4G13930                                       | SHMTcy1     | Serine hydroxymethyltransferase                           | 0.13                     | 1.00E+0 | -0.48                    | 1.00E+0 | -0.14                    | 1.00E+0 |
| AT4G13890                                       | SHMTcy2     | Serine hydroxymethyltransferase                           | ns                       | ns      | ns                       | ns      | ns                       | ns      |
| AT1G36370                                       | SHMTcp2     | Serine hydroxymethyltransferase                           | -0.09                    | 1.00E+0 | 3.04                     | 0.00E+0 | 0.57                     | 1.00E+0 |
| AT1G22020                                       | SHMTcy3     | Serine hydroxymethyltransferase                           | 0.09                     | 1.00E+0 | 0.03                     | 1.00E+0 | 0.11                     | 1.00E+0 |
| AT2G26080                                       | P           | Glycine decarboxylase - P protein                         | -0.02                    | 1.00E+0 | 0.64                     | 1.14E-1 | 0.00                     | 1.00E+0 |
| AT4G33010                                       | P           | Glycine decarboxylase - P protein                         | 0.06                     | 1.00E+0 | -0.14                    | 1.00E+0 | -1.14                    | 1.55E-8 |
| AT1G11860                                       | T           | Glycine decarboxylase - T protein                         | 0.15                     | 1.00E+0 | -0.27                    | 1.00E+0 | -1.43                    | 0.00E+0 |

|           |          |                                   |       |         |       |          |       |         |
|-----------|----------|-----------------------------------|-------|---------|-------|----------|-------|---------|
| AT1G60990 | T        | Glycine decarboxylase - T protein | 0.00  | 1.00E+0 | 0.23  | 1.00E+0  | -0.45 | 1.00E+0 |
| AT1G48030 | L (LPD1) | Glycine decarboxylase - L protein | ns    | ns      | ns    | ns       | ns    | ns      |
| AT3G17240 | L (LPD2) | Glycine decarboxylase - L protein | 0.13  | 1.00E+0 | 0.13  | 1.00E+0  | -0.06 | 1.00E+0 |
| AT3G16950 | L        | Glycine decarboxylase - L protein | 0.15  | 1.00E+0 | -0.19 | 1.00E+0  | -0.37 | 1.00E+0 |
| AT4G16155 | L        | Glycine decarboxylase - L protein | ns    | ns      | ns    | ns       | ns    | ns      |
| AT2G35120 | H        | Glycine decarboxylase - H protein | -0.11 | 1.00E+0 | -0.99 | 5.17E-6  | -1.49 | 0.00E+0 |
| AT2G35370 | H        | Glycine decarboxylase - H protein | ns    | ns      | ns    | ns       | ns    | ns      |
| AT1G32470 | H        | Glycine decarboxylase - H protein | 0.09  | 1.00E+0 | -1.12 | 3.37E-11 | -1.96 | 0.00E+0 |

#### Folate carriers

|           |         |                                                           |      |         |       |         |       |         |
|-----------|---------|-----------------------------------------------------------|------|---------|-------|---------|-------|---------|
| AT5G66380 | AtFOLT1 | Folate transporter (plastids)                             | 0.04 | 1.00E+0 | -0.08 | 1.00E+0 | -0.13 | 1.00E+0 |
| AT2G32040 | FBT1    | Folate transporter (plastids)                             | 0.00 | 1.00E+0 | 0.29  | 1.00E+0 | 0.32  | 1.00E+0 |
| AT1G30400 | AtMRP1  | glutathione S-conjugate transporting ATPase (tonoplast)   | 0.03 | 1.00E+0 | -0.28 | 1.00E+0 | -0.02 | 1.00E+0 |
| AT2G47800 | AtMRP4  | ATPase transporter, multidrug transport (plasma membrane) | 0.05 | 1.00E+0 | -0.07 | 1.00E+0 | 0.15  | 1.00E+0 |

#### Methionine synthesis and recycling

|           |       |                                                            |       |         |       |         |       |         |
|-----------|-------|------------------------------------------------------------|-------|---------|-------|---------|-------|---------|
| AT3G01120 | CGS1  | Cystathionine gamma-synthase                               | 0.08  | 1.00E+0 | 0.30  | 1.00E+0 | 0.55  | 1.00E+0 |
| AT3G57050 | CBL   | Cystathionine beta-lyase                                   | -0.05 | 1.00E+0 | -0.31 | 1.00E+0 | -0.25 | 1.00E+0 |
| AT5G17920 | MS1   | Methionine synthase                                        | 0.04  | 1.00E+0 | 0.14  | 1.00E+0 | -1.05 | 8.71E-7 |
| AT3G03780 | MS2   | Methionine synthase                                        | 0.04  | 1.00E+0 | -0.36 | 1.00E+0 | -1.19 | 1.55E-9 |
| AT5G20980 | MS3   | Methionine synthase                                        | -0.09 | 1.00E+0 | -0.31 | 1.00E+0 | -0.15 | 1.00E+0 |
| AT1G64660 | MGL   | Methionine gamma-lyase                                     | 0.04  | 1.00E+0 | -0.18 | 1.00E+0 | -1.71 | 0.00E+0 |
| AT1G66520 | FMT   | Methionyl-tRNA formyltransferase                           | ns    | ns      | ns    | ns      | ns    | ns      |
| AT4G01850 | SAMS2 | S-adenosylmethionine synthetase                            | -0.08 | 1.00E+0 | -0.92 | 1.29E-6 | -0.05 | 1.00E+0 |
| AT3G17390 | SAMS3 | S-adenosylmethionine synthetase                            | ns    | ns      | ns    | ns      | ns    | ns      |
| AT1G02500 | SAMS1 | S-adenosylmethionine synthetase                            | -0.10 | 1.00E+0 | -0.17 | 1.00E+0 | -0.65 | 9.37E-1 |
| AT2G36880 | SAMS4 | S-adenosylmethionine synthetase                            | -0.14 | 1.00E+0 | 0.77  | 1.06E-3 | -0.71 | 2.23E-1 |
| AT4G13940 | SAHH1 | S-adenosylhomocysteine hydrolase                           | 0.07  | 1.00E+0 | -0.10 | 1.00E+0 | -0.40 | 1.00E+0 |
| AT3G23810 | SAHH2 | S-adenosylhomocysteine hydrolase                           | 0.11  | 1.00E+0 | -0.37 | 1.00E+0 | -1.71 | 0.00E+0 |
| AT5G49810 | MMT   | Methionine S-methyl transferase                            | 0.04  | 1.00E+0 | -0.08 | 1.00E+0 | -1.05 | 9.33E-7 |
| AT3G25900 | HMT1  | Homocysteine S-methyltransferase                           | -0.06 | 1.00E+0 | 0.67  | 4.21E-2 | 0.40  | 1.00E+0 |
| AT3G63250 | HMT2  | Homocysteine S-methyltransferase                           | 0.00  | 1.00E+0 | -0.12 | 1.00E+0 | -0.04 | 1.00E+0 |
| AT3G22740 | HMT3  | Homocysteine S-methyltransferase                           | -0.04 | 1.00E+0 | -0.08 | 1.00E+0 | 0.55  | 1.00E+0 |
| AT3G09820 | ADK1  | Adenosine kinase                                           | 0.00  | 1.00E+0 | -0.01 | 1.00E+0 | 0.04  | 1.00E+0 |
| AT5G03300 | ADK2  | Adenosine kinase                                           | -0.04 | 1.00E+0 | -0.43 | 1.00E+0 | -2.60 | 0.00E+0 |
| AT4G39460 | SAMT1 | S-adenosylmethionine transporter (plastids)                | 0.01  | 1.00E+0 | 0.28  | 1.00E+0 | 0.02  | 1.00E+0 |
| AT1G34065 | SAMT2 | S-adenosylmethionine transporter (mitochondrial, putative) | 0.03  | 1.00E+0 | -0.41 | 1.00E+0 | -0.27 | 1.00E+0 |

#### S-adenosylmethionine-dependent methyltransferases

|           |       |                                                     |       |         |       |         |       |          |
|-----------|-------|-----------------------------------------------------|-------|---------|-------|---------|-------|----------|
| AT1G04870 |       | arginine N-methyltransferase family protein         | -0.08 | 1.00E+0 | -0.07 | 1.00E+0 | 1.74  | 0.00E+0  |
| AT1G76090 | SMT3  | S-adenosyl-methionine-sterol-C-methyltransferase    | -0.18 | 1.00E+0 | 0.77  | 8.52E-4 | 1.63  | 0.00E+0  |
| AT1G20330 | SMT2  | sterol-C24-methyltransferase                        | 0.06  | 1.00E+0 | 0.89  | 5.73E-6 | 1.20  | 9.14E-10 |
| AT3G26410 |       | methyltransferase/ nucleic acid binding             | 0.01  | 1.00E+0 | 0.49  | 1.00E+0 | 1.18  | 2.28E-9  |
| AT1G64970 | G-TMT | gamma-tocopherol methyltransferase (g-TMT)          | 0.08  | 1.00E+0 | -1.44 | 0.00E+0 | -0.89 | 4.38E-4  |
| AT5G49020 |       | protein arginine N-methyltransferase family protein | 0.00  | 1.00E+0 | -0.55 | 1.00E+0 | -1.32 | 0.00E+0  |
| AT1G48600 |       | phosphoethanolamine N-methyltransferase 2           | -0.03 | 1.00E+0 | -0.34 | 1.00E+0 | -2.19 | 0.00E+0  |
| AT5G13710 | SMT1  | SMT1 controls the level of cholesterol in plants    | -0.04 | 1.00E+0 | -0.24 | 1.00E+0 | -3.08 | 0.00E+0  |
| AT3G18000 | NMT1  | N-methyltransferase-like protein                    | -0.01 | 1.00E+0 | -0.14 | 1.00E+0 | -3.17 | 0.00E+0  |

#### Other genes coding folate-dependent enzymes

|           |        |                                                             |      |         |       |         |       |         |
|-----------|--------|-------------------------------------------------------------|------|---------|-------|---------|-------|---------|
| AT1G31220 | GART   | Glycinamide ribonucleotide formyltransferase                | 0.03 | 1.00E+0 | 0.16  | 1.00E+0 | -0.01 | 1.00E+0 |
| AT2G35040 | AICART | Aminoimidazole-carboxamide ribonucleotide formyltransferase | 0.04 | 1.00E+0 | -0.01 | 1.00E+0 | 0.16  | 1.00E+0 |
| AT2G46110 | KPHMT1 | Ketopantoate hydroxymethyltransferase                       | 0.15 | 1.00E+0 | -0.08 | 1.00E+0 | -0.08 | 1.00E+0 |
| AT3G61530 | KPHMT2 | Ketopantoate hydroxymethyltransferase                       | 0.01 | 1.00E+0 | 0.04  | 1.00E+0 | 0.96  | 4.08E-5 |



## Supplemental Table S5. Expression of genes involved in the sulfate assimilatory pathway in Arabidopsis cells treated with MTX.

Microarray data are expressed in log<sub>2</sub>(ratio) obtained from comparisons between MTX-treated and control cells after 2, 6, and 24h of treatment (see Fig. 2). A statistical cut-off  $P < 0.05$  after Bonferroni correction was used to determine which genes were differentially expressed in response to MTX. Positive (red boxes) and negative (green boxes) ratio indicate that the genes are induced or repressed by MTX, respectively. The average log<sub>2</sub>(ratio) and P-value for 2 independent biological repeats of the experiment is shown.

| Accession number                             | Gene description                             | MTX / control 2h         |         | MTX / control 6h         |         | MTX / control 24h        |         |
|----------------------------------------------|----------------------------------------------|--------------------------|---------|--------------------------|---------|--------------------------|---------|
|                                              |                                              | log <sub>2</sub> (ratio) | P-value | log <sub>2</sub> (ratio) | P-value | log <sub>2</sub> (ratio) | P-value |
| <b>Sulfate transporters</b>                  |                                              |                          |         |                          |         |                          |         |
| AT1G22150                                    | sulfate transporter (SULTR1.3)               | 0.05                     | 1.00E+0 | 0.41                     | 1.00E+0 | -0.11                    | 1.00E+0 |
| AT1G23090                                    | sulfate transporter (AST91)                  | 0.05                     | 1.00E+0 | 0.08                     | 1.00E+0 | 0.07                     | 1.00E+0 |
| AT1G77990                                    | sulfate transporter (AST56)                  | 0.02                     | 1.00E+0 | 0.20                     | 1.00E+0 | -0.13                    | 1.00E+0 |
| AT1G78000                                    | sulfate transporter (SULTR1.2)               | -0.14                    | 1.00E+0 | 0.43                     | 1.00E+0 | 0.20                     | 1.00E+0 |
| AT1G80310                                    | sulfate transporter                          | 0.05                     | 1.00E+0 | 0.90                     | 4.04E-6 | -0.19                    | 1.00E+0 |
| AT2G25680                                    | sulfate transporter                          | 0.13                     | 1.00E+0 | -0.06                    | 1.00E+0 | 0.02                     | 1.00E+0 |
| AT3G12520                                    | sulfate transporter (SULTR4.2)               | -0.08                    | 1.00E+0 | 0.08                     | 1.00E+0 | -0.02                    | 1.00E+0 |
| AT3G15990                                    | sulfate transporter (SULTR3.4)               | 0.17                     | 1.00E+0 | 0.84                     | 4.79E-5 | -1.81                    | 0.00E+0 |
| AT3G51895                                    | sulfate transporter (SULTR3.1)               | 0.01                     | 1.00E+0 | 0.01                     | 1.00E+0 | 0.04                     | 1.00E+0 |
| AT4G02700                                    | sulfate transporter (SULTR3.2)               | 0.11                     | 1.00E+0 | 0.01                     | 1.00E+0 | 0.03                     | 1.00E+0 |
| AT4G08620                                    | sulfate transporter (SULTR1.1)               | -0.01                    | 1.00E+0 | 0.07                     | 1.00E+0 | -0.09                    | 1.00E+0 |
| AT5G10180                                    | sulfate transporter (SULTR2.1; AST68)        | -0.12                    | 1.00E+0 | 0.56                     | 1.00E+0 | -1.36                    | 0.00E+0 |
| AT5G13550                                    | sulfate transporter (SULTR4.1)               | 0.06                     | 1.00E+0 | 0.83                     | 9.03E-5 | 0.55                     | 1.00E+0 |
| AT5G19600                                    | sulfate transporter (SULTR3.5)               | 0.01                     | 1.00E+0 | 0.07                     | 1.00E+0 | -0.10                    | 1.00E+0 |
| <b>Sulfate activation and reduction</b>      |                                              |                          |         |                          |         |                          |         |
| AT1G19920                                    | ATP sulfurylase (APS2)                       | 0.11                     | 1.00E+0 | -0.47                    | 1.00E+0 | -1.05                    | 1.05E-6 |
| AT5G43780                                    | ATP sulfurylase (APS4)                       | -0.08                    | 1.00E+0 | -0.39                    | 1.00E+0 | -0.46                    | 1.00E+0 |
| AT3G22890                                    | ATP sulfurylase (APS1)                       | 0.10                     | 1.00E+0 | 2.31                     | 0.00E+0 | 2.61                     | 0.00E+0 |
| AT4G14680                                    | ATP sulfurylase (APS3)                       | 0.03                     | 1.00E+0 | -0.06                    | 1.00E+0 | -0.01                    | 1.00E+0 |
| AT1G62180                                    | adenosine 5'-phosphosulfate reductase (APR2) | 0.10                     | 1.00E+0 | -0.01                    | 1.00E+0 | 0.88                     | 7.50E-4 |
| AT4G04610                                    | adenosine 5'-phosphosulfate reductase (APR1) | -0.04                    | 1.00E+0 | 4.31                     | 0.00E+0 | 1.66                     | 0.00E+0 |
| AT4G21990                                    | adenosine 5'-phosphosulfate reductase (APR3) | 0.02                     | 1.00E+0 | 0.26                     | 1.00E+0 | -0.05                    | 1.00E+0 |
| AT5G04590                                    | sulfite reductase                            | 0.03                     | 1.00E+0 | 0.31                     | 1.00E+0 | 0.67                     | 6.03E-1 |
| AT2G14750                                    | adenylsulfate kinase (AKN1)                  | 0.05                     | 1.00E+0 | 0.96                     | 1.48E-7 | -0.57                    | 1.00E+0 |
| <b>Cysteine and glutathione biosynthesis</b> |                                              |                          |         |                          |         |                          |         |
| AT2G43750                                    | O-acetylserine (thiol) lyase (oasB)          |                          |         |                          |         |                          |         |
| AT3G03630                                    | O-acetylserine (thiol) lyase (CS26)          | 0.01                     | 1.00E+0 | -0.01                    | 1.00E+0 | -0.01                    | 1.00E+0 |
| AT3G04940                                    | O-acetylserine (thiol) lyase (CYSD1)         | 0.03                     | 1.00E+0 | -0.49                    | 1.00E+0 | -0.90                    | 3.69E-4 |
| AT3G59760                                    | O-acetylserine (thiol) lyase (oasC)          | 0.05                     | 1.00E+0 | 0.14                     | 1.00E+0 | 0.07                     | 1.00E+0 |
| AT3G61440                                    | O-acetylserine (thiol) lyase (CYSC1)         | 0.25                     | 1.00E+0 | 0.81                     | 2.19E-4 | -0.19                    | 1.00E+0 |
| AT4G14880                                    | O-acetylserine (thiol) lyase (oasA1)         | 0.18                     | 1.00E+0 | 0.94                     | 4.15E-7 | 0.15                     | 1.00E+0 |
| AT5G28020                                    | O-acetylserine (thiol) lyase (CYSD2)         | 0.04                     | 1.00E+0 | -0.06                    | 1.00E+0 | 0.03                     | 1.00E+0 |
| AT1G55920                                    | serine O-acetyltransferase (SAT2.1)          | -0.11                    | 1.00E+0 | 2.35                     | 0.00E+0 | 0.96                     | 3.79E-5 |
| AT2G17640                                    | serine O-acetyltransferase (SAT3.1)          | 0.05                     | 1.00E+0 | 0.32                     | 1.00E+0 | 0.20                     | 1.00E+0 |
| AT3G13110                                    | serine O-acetyltransferase (SAT2.2)          | 0.02                     | 1.00E+0 | 0.12                     | 1.00E+0 | -0.03                    | 1.00E+0 |
| AT4G35640                                    | serine O-acetyltransferase (SAT3.2)          | 0.03                     | 1.00E+0 | 0.04                     | 1.00E+0 | 0.02                     | 1.00E+0 |
| AT5G56760                                    | serine O-acetyltransferase (SAT1.1)          | -0.02                    | 1.00E+0 | -0.35                    | 1.00E+0 | -0.19                    | 1.00E+0 |
| AT5G27380                                    | glutathione synthetase (GSH2)                | -0.02                    | 1.00E+0 | 0.18                     | 1.00E+0 | -0.15                    | 1.00E+0 |
| AT4G23100                                    | glutamate-cysteine ligase (GSH1)             | -0.12                    | 1.00E+0 | 0.70                     | 1.56E-2 | 0.12                     | 1.00E+0 |

**Supplemental Table S6. Sequences of primers used for qPCR.**

| Accession number | Gene description                                | Gene name | Forward primer          | Reverse primer               |
|------------------|-------------------------------------------------|-----------|-------------------------|------------------------------|
| AT1G19770        | purine permease                                 | PUP 14    | GGATTCTCGAAAGGGAAAGG    | GCGCTTAAGACGGCAGTAAC         |
| AT1G36370        | serine hydroxymethyltransferase (plastidial)    | cpSHMT    | CGAGAAAGTGTGTGAGATGTGCC | CCATGCTCTCTCTGCAACGC         |
| AT1G50480        | 10-formyltetrahydrofolate synthetase            | FTHFS     | GAAGGAAGCGTAGTTTCAGTGAC | TGACCAATAGTAATCTTCCTCAAGAACC |
| AT3G02470        | S-adenosylmethionine decarboxylase              | SAMdc     | CTCCCTCGTTACAGCATTG     | GGAGAGAACGATTGGATCCG         |
| AT3G22370        | alternative oxidase 1a                          | AOX1a     | ATGTTCTGCTCCGGCTATTG    | CCTTTAGTTCACGACCTTGGTAGTG    |
| AT3G23810        | S-adenosyl-L-homocysteine hydrolase             | SAHH2     | GACTGGAGCTCTTTGTTCCCTG  | CACTATGACACGAGCACCCG         |
| AT3G55630        | folylpolyglutamate synthetase (cytosolic)       | FPGSD     | GAAATTGCTGCAGAGAAAGCC   | GAAATGTAGACACAACGCAAC        |
| AT4G04610        | 5'-adenylylsulfate reductase                    | APR1      | CCAGAAGGAGTTTGCTAAGCAGG | CTAGCAATCTGGAACGAGACGAAG     |
| AT4G37930        | serine hydroxymethyltransferase (mitochondrial) | mtSHMT    | CTGTCTCCCTGGTCTTCAAGG   | GCAATGTGAACAGCTTCCAACAC      |
| AT5G10180        | sulfate transporter                             | SULTR2.1  | TGATCAACGTCGATACATCGGG  | GCCACCGATTCTGTCGACG          |
| AT1G74590        | glutathione transferase                         | GSTU10    | CCCGGTGCACAAGAAGATTCC   | GGACATGACTTGACCCATGACCTC     |
| AT5G09810        | actin 2/7                                       | ACT2/7    | ACATCGTTCTCAGTGGTGGTTC  | ACCTGACTCATCGTACTCACTC       |
| AT5G17920        | vitamin-B12-independent methionine synthase     | MS1       | CTGTGGTCTCAAGACCCGT     | CCTTGTTCAAATCAAGCTTTTC       |
